# Supplementary material for: Crystal structure of mammalian cryptochrome in complex with a small molecule competitor of its ubiquitin ligase
Source: PubMed Central journal article supplement — Cell Res. 2013 Oct 1;23(12):1417–9. doi: 10.1038/cr.2013.136 (PMC3847572; doi:10.1038/cr.2013.136), 2013-10-01
Supplement: cr2013136x1.pdf [file cr2013136x1.pdf]

Supplementary Information, Figure S1

A

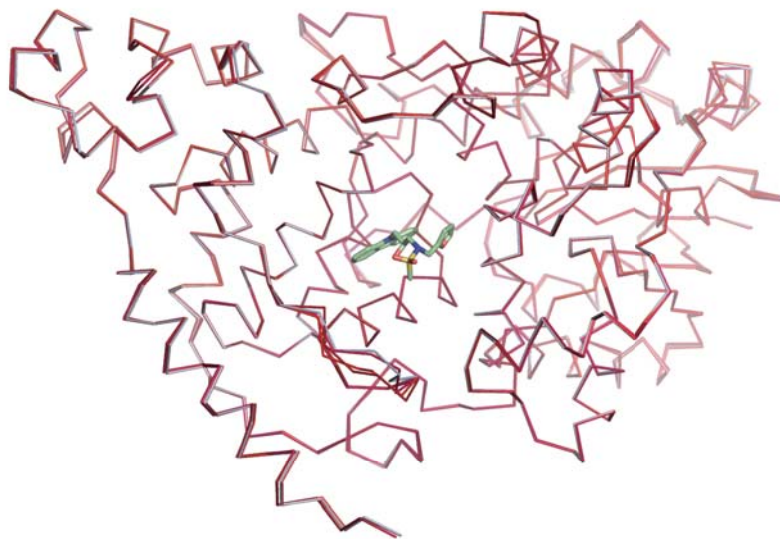

B

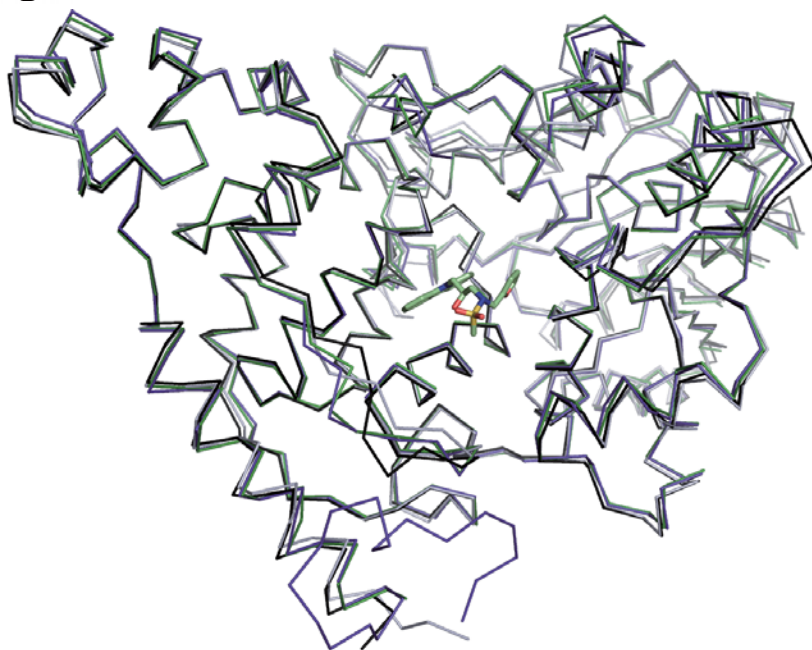

**Figure S1.** Superposition analyses of murine CRY2 PHR domain structures. **(A)** The four molecules in the asymmetric unit of the CRY2-KL001 complex are superimposed and shown in different colors. KL001 is shown in sticks (green). **(B)** The crystal structure of murine CRY2 in the apo (green), FAD-bound (black, FAD omitted), FBXL3-complexed (purple, FBXL3-Skp1 omitted) forms are superimposed with that of the KL001-bound form (gray). KL001 is shown in sticks.
