# Supplementary material for: Crystal structure of mammalian cryptochrome in complex with a small molecule competitor of its ubiquitin ligase
Source: PubMed Central journal article supplement — Cell Res. 2013 Oct 1;23(12):1417–9. doi: 10.1038/cr.2013.136 (PMC3847572; doi:10.1038/cr.2013.136), 2013-10-01
Supplement: cr2013136x2.pdf [file cr2013136x2.pdf]

Supplementary Information, Figure S2

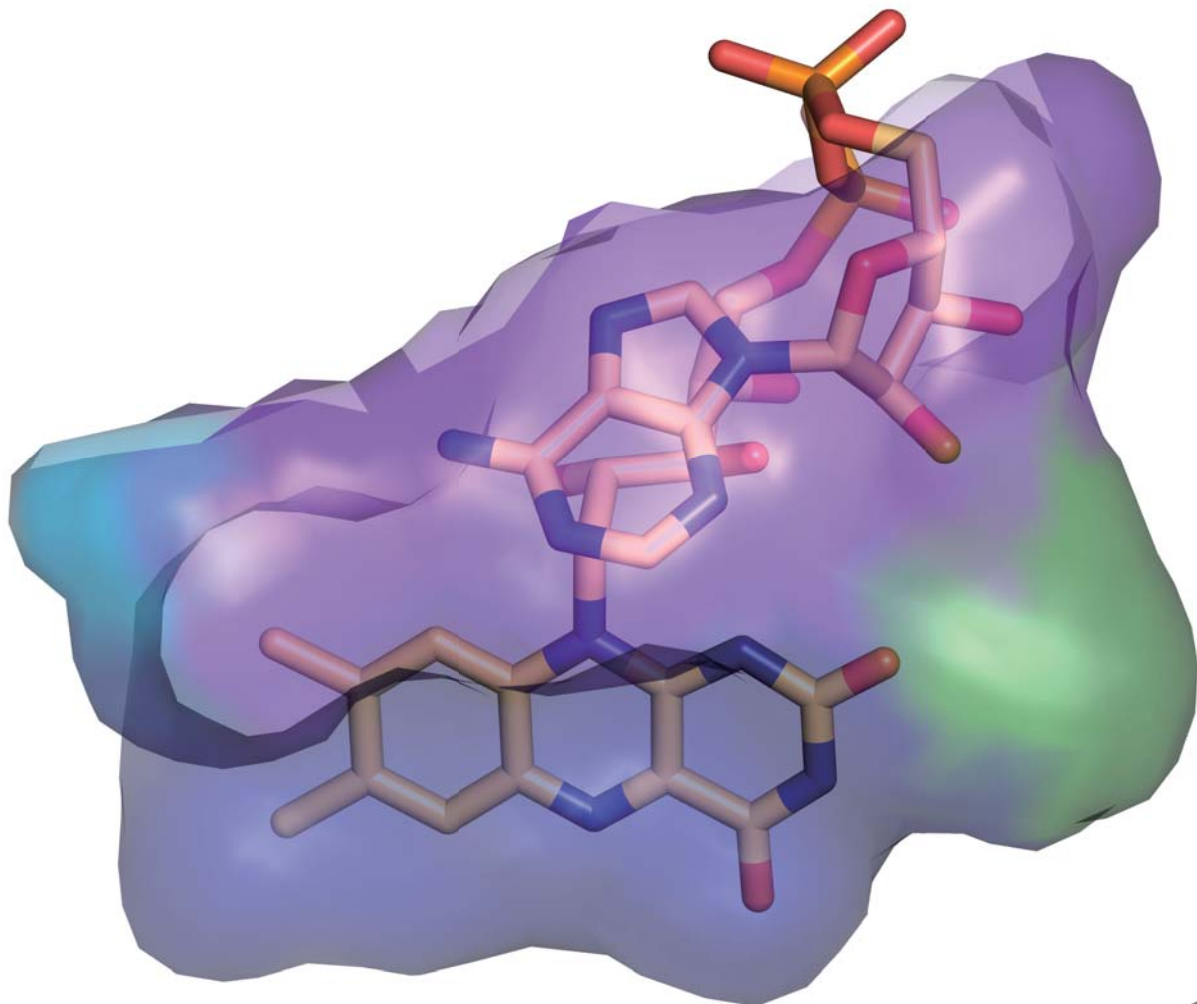

**Figure S2.** Subdivision of the FAD-binding pocket of murine CRY2. The FAD-bound mCRY2 PHR domain with FAD in sticks (yellow). Residues that form the inner cleft, auxiliary cleft, and the outer crater are colored in dark blue, green, and violet, respectively. Residues involved in constructing the outer vestibule, which accommodates the methanesulfonamide group of KL001, are colored in light blue.
