# Supplementary material for: Crystal structure of mammalian cryptochrome in complex with a small molecule competitor of its ubiquitin ligase
Source: PubMed Central journal article supplement — Cell Res. 2013 Oct 1;23(12):1417–9. doi: 10.1038/cr.2013.136 (PMC3847572; doi:10.1038/cr.2013.136), 2013-10-01
Supplement: cr2013136x4.pdf [file cr2013136x4.pdf]

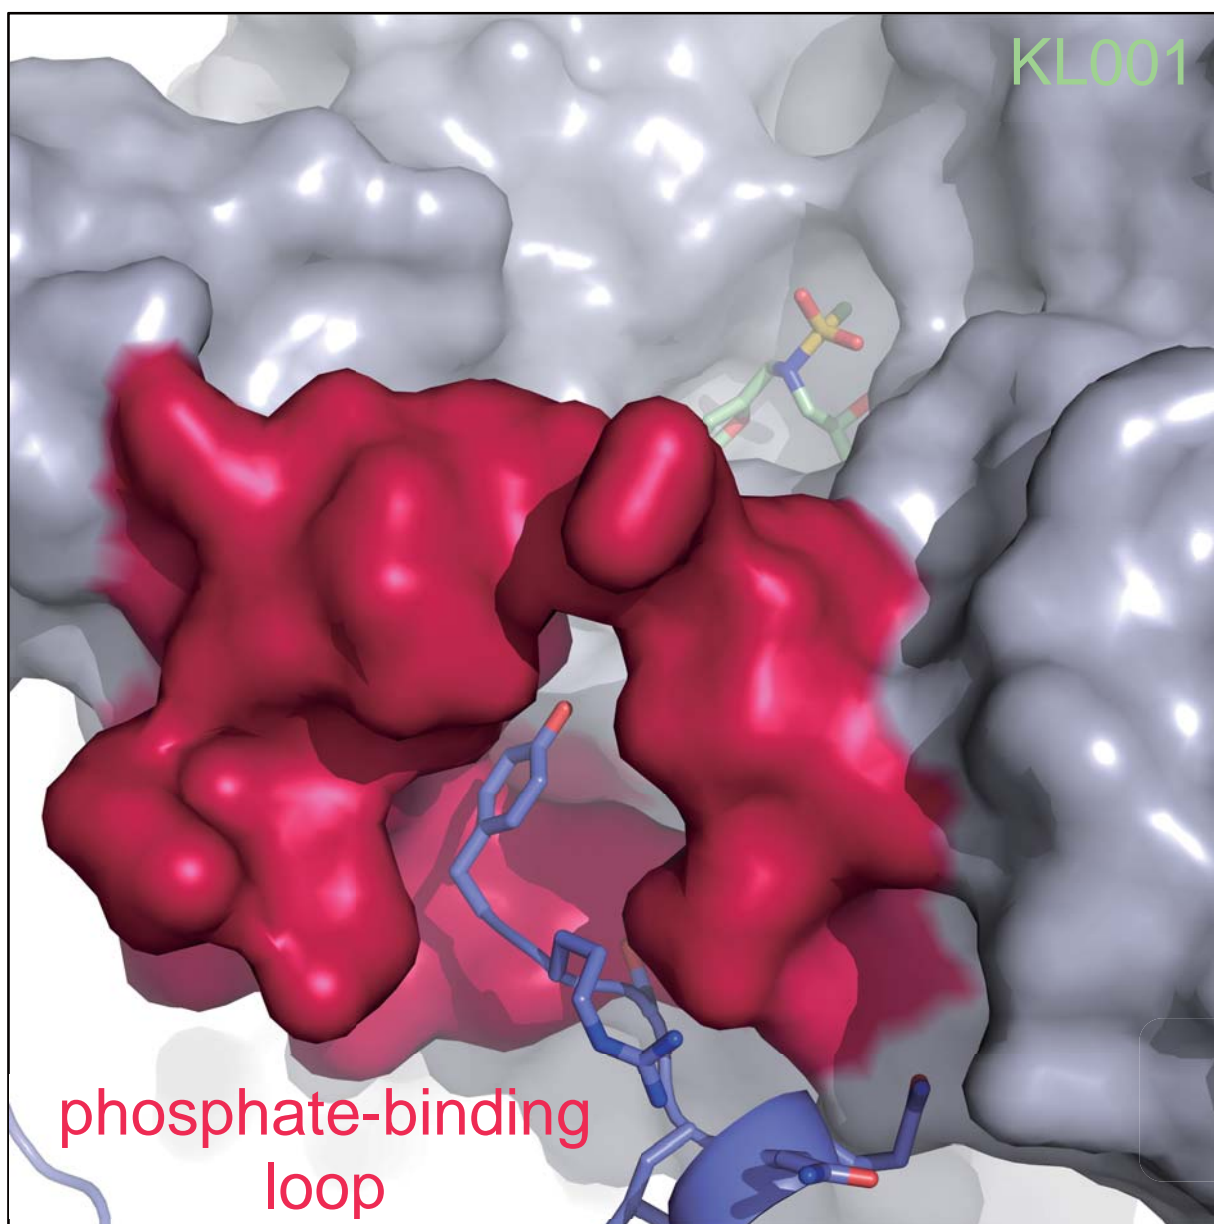

**Figure S4.** Stabilization of mCRY2 phosphate-binding loop by crystal packing. A close up view of the interaction between the phosphate-binding loop and the C-terminal Tyr residue (blue) of a nearby molecule in the crystal. KL001 (green) is at the opposite end of the FAD-binding pocket to the phosphate-binding loop.
