# Supplementary material for: Crystal structure of mammalian cryptochrome in complex with a small molecule competitor of its ubiquitin ligase
Source: PubMed Central journal article supplement — Cell Res. 2013 Oct 1;23(12):1417–9. doi: 10.1038/cr.2013.136 (PMC3847572; doi:10.1038/cr.2013.136), 2013-10-01
Supplement: cr2013136x5.pdf [file cr2013136x5.pdf]

Supplementary Information, Figure S5

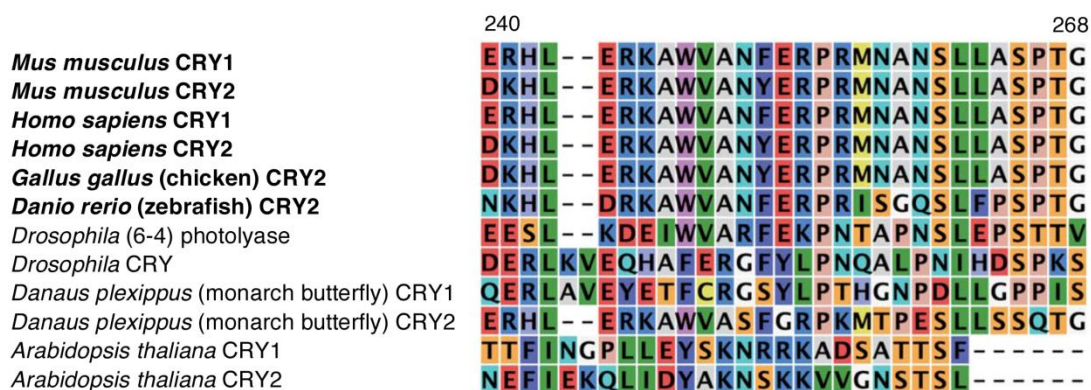

**Figure S5.** Sequence alignment of cryptochrome phosphate-binding loop. Phosphate-binding loop (amino acids mCRY2 240-268) sequence alignment between vertebrates (bold) and other organisms. *D. plexippus* CRY1 (Type I cryptochrome) is phylogenetically closer to *D. melanogaster* CRY, where as *D. plexippus* CRY2 (Type II cryptochrome) is phylogenetically closer to vertebrate CRY.
