# Supplementary material for: Crystal structure of mammalian cryptochrome in complex with a small molecule competitor of its ubiquitin ligase
Source: PubMed Central journal article supplement — Cell Res. 2013 Oct 1;23(12):1417–9. doi: 10.1038/cr.2013.136 (PMC3847572; doi:10.1038/cr.2013.136), 2013-10-01
Supplement: cr2013136x6.pdf [file cr2013136x6.pdf]

Supplementary Information, Table S1 Data collection and refinement statistics

| CRY2-KL001                                           |                           |
|------------------------------------------------------|---------------------------|
| <b>Data collection</b>                               |                           |
| PDB                                                  | 4MLP                      |
| Space group                                          | P1                        |
| Cell dimensions                                      |                           |
| <i>a</i> , <i>b</i> , <i>c</i> (Å)                   | 48.1, 93.8, 141.6         |
| $\alpha$ , $\beta$ , $\gamma$ (°)                    | 90.1, 90.0, 90.3          |
| Resolution (Å)                                       | 50 – 1.94 (1.98 – 1.94) * |
| <i>R</i> <sub>sym</sub> or <i>R</i> <sub>merge</sub> | 0.079 (0.601)             |
| <i>I</i> / $\sigma$ <i>I</i>                         | 32.2 (3.6)                |
| Completeness (%)                                     | 97.1 (95.1)               |
| Redundancy                                           | 3.7 (3.8)                 |
| <b>Refinement</b>                                    |                           |
| Resolution (Å)                                       | 1.94                      |
| No. reflections                                      | 170540                    |
| <i>R</i> <sub>work</sub> / <i>R</i> <sub>free</sub>  | 0.180 / 0.217             |
| No. atoms                                            |                           |
| Protein                                              | 16060                     |
| Ligand/ion                                           | 112                       |
| Water                                                | 1557                      |
| <i>B</i> -factors                                    |                           |
| Protein                                              | 32.37                     |
| Ligand/ion                                           | 32.25                     |
| Water                                                | 36.97                     |
| R.m.s. deviations                                    |                           |
| Bond lengths (Å)                                     | 0.007                     |
| Bond angles (°)                                      | 1.087                     |

Each dataset was collected from a single crystal

\*Values in parentheses are for highest-resolution shell.
